# Supplementary material
Source: publisher figshare collection journal article supplement (https://frontiersin.figshare.com/ndownloader/files/23393057)
Supplement: Supplementary file [file 23393057]

**SUPPLEMENTAL FIGURE 1** FTY-DC are immature after LPS stimulation compared to Veh-DC.

**(A)** Timeline of BMDC propagation with GM-CSF (3 total treatments) and FTY720 (4 total treatments). 7-day old BMDCs either Vehicle or FTY720 treated were stimulated overnight with 100 ng/ml LPS. Flow cytometry of BMDCs, gated on live, singlets, CD11c<sup>+</sup> cells, graphs shown of MFI. **(B)** Expression of MHCII. **(C)** Expression of CD40. **(D)** Expression of CD80. **(E)** Expression of CD86. **(F)** Expression of PDL1 and **(G)** Ratio of PDL1/CD86. **(H)** Western blot analysis of Veh-DC stimulated overnight with and without 100 ng/ml LPS. **(I)** Western blot analysis of FTY-DC stimulated overnight with and without 100 ng/ml LPS. **(J)** Quantification of individual mitochondria complexes relative to GAPDH. Data represent means  $\pm$  SEM, \* $p \leq 0.05$ , \*\* $p \leq 0.01$ , and \*\*\* $p \leq 0.001$  one-way ANOVA followed by Tukey's post-test.
